# Supplementary material for: A systems-approach reveals human nestin is an endothelial-enriched, angiogenesis-independent intermediate filament protein
Source: Sci Rep. 2018 Oct 2;8:14668. doi: 10.1038/s41598-018-32859-4 (PMC6168570; doi:10.1038/s41598-018-32859-4)
Supplement: Supplementary file 2 — Supplemental unmarked [file 41598_2018_32859_MOESM2_ESM.pdf]

SUPPLEMENTAL FIGURE 1

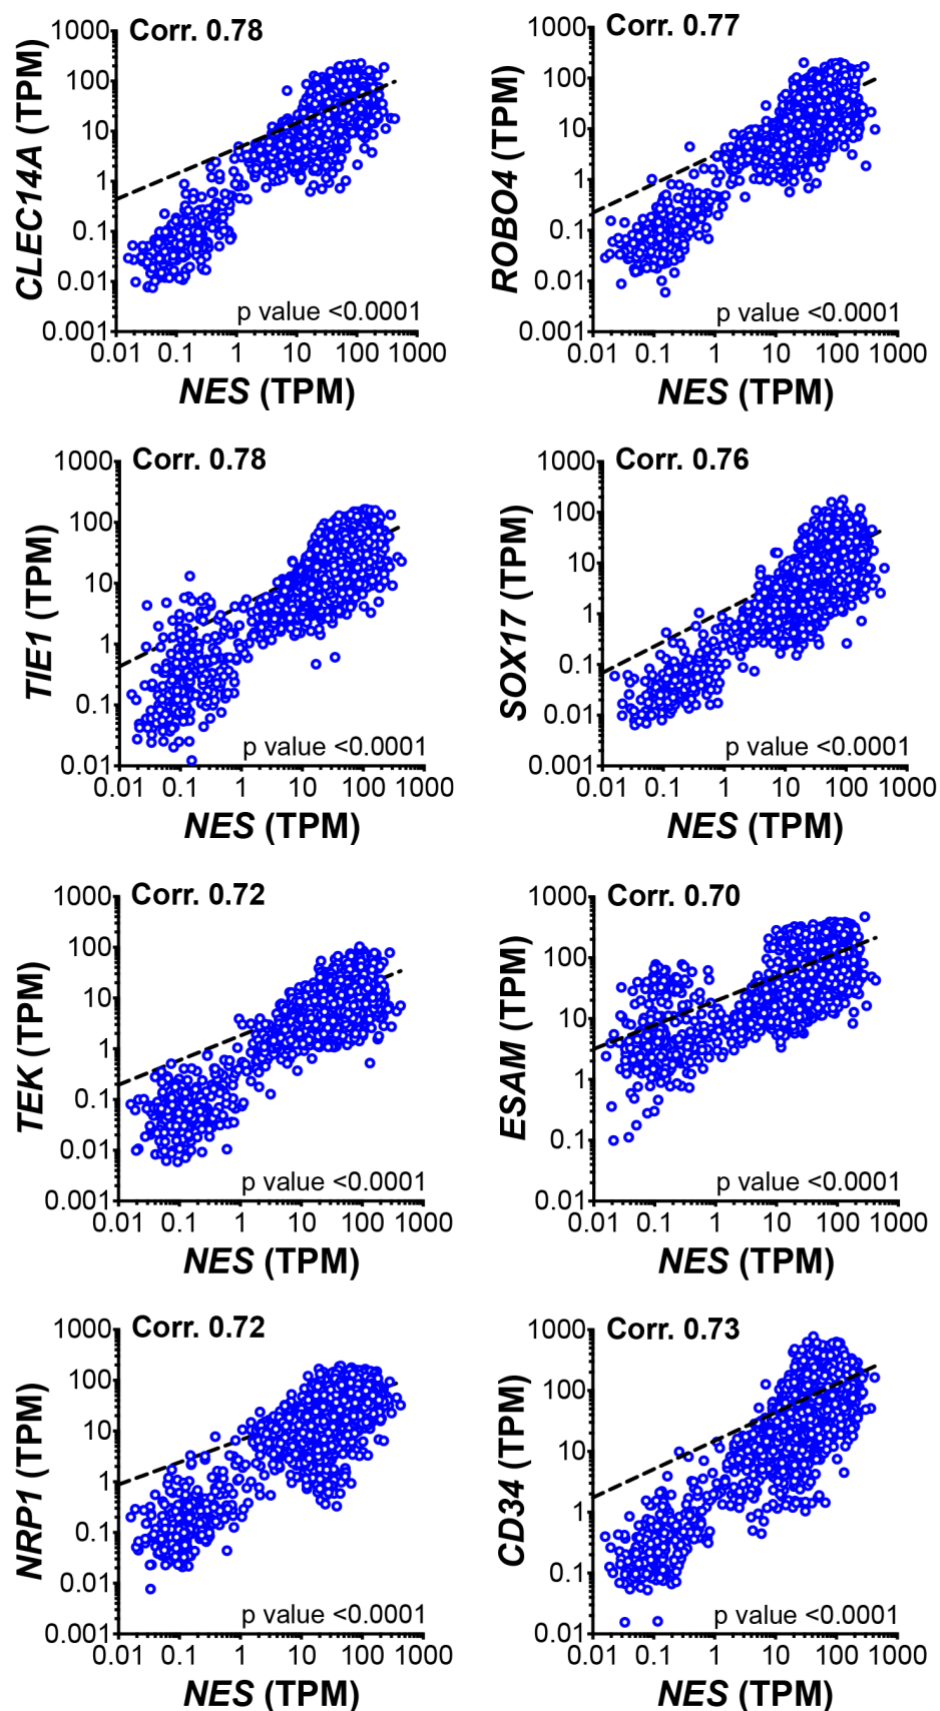

SUPPLEMENTAL FIGURE 2

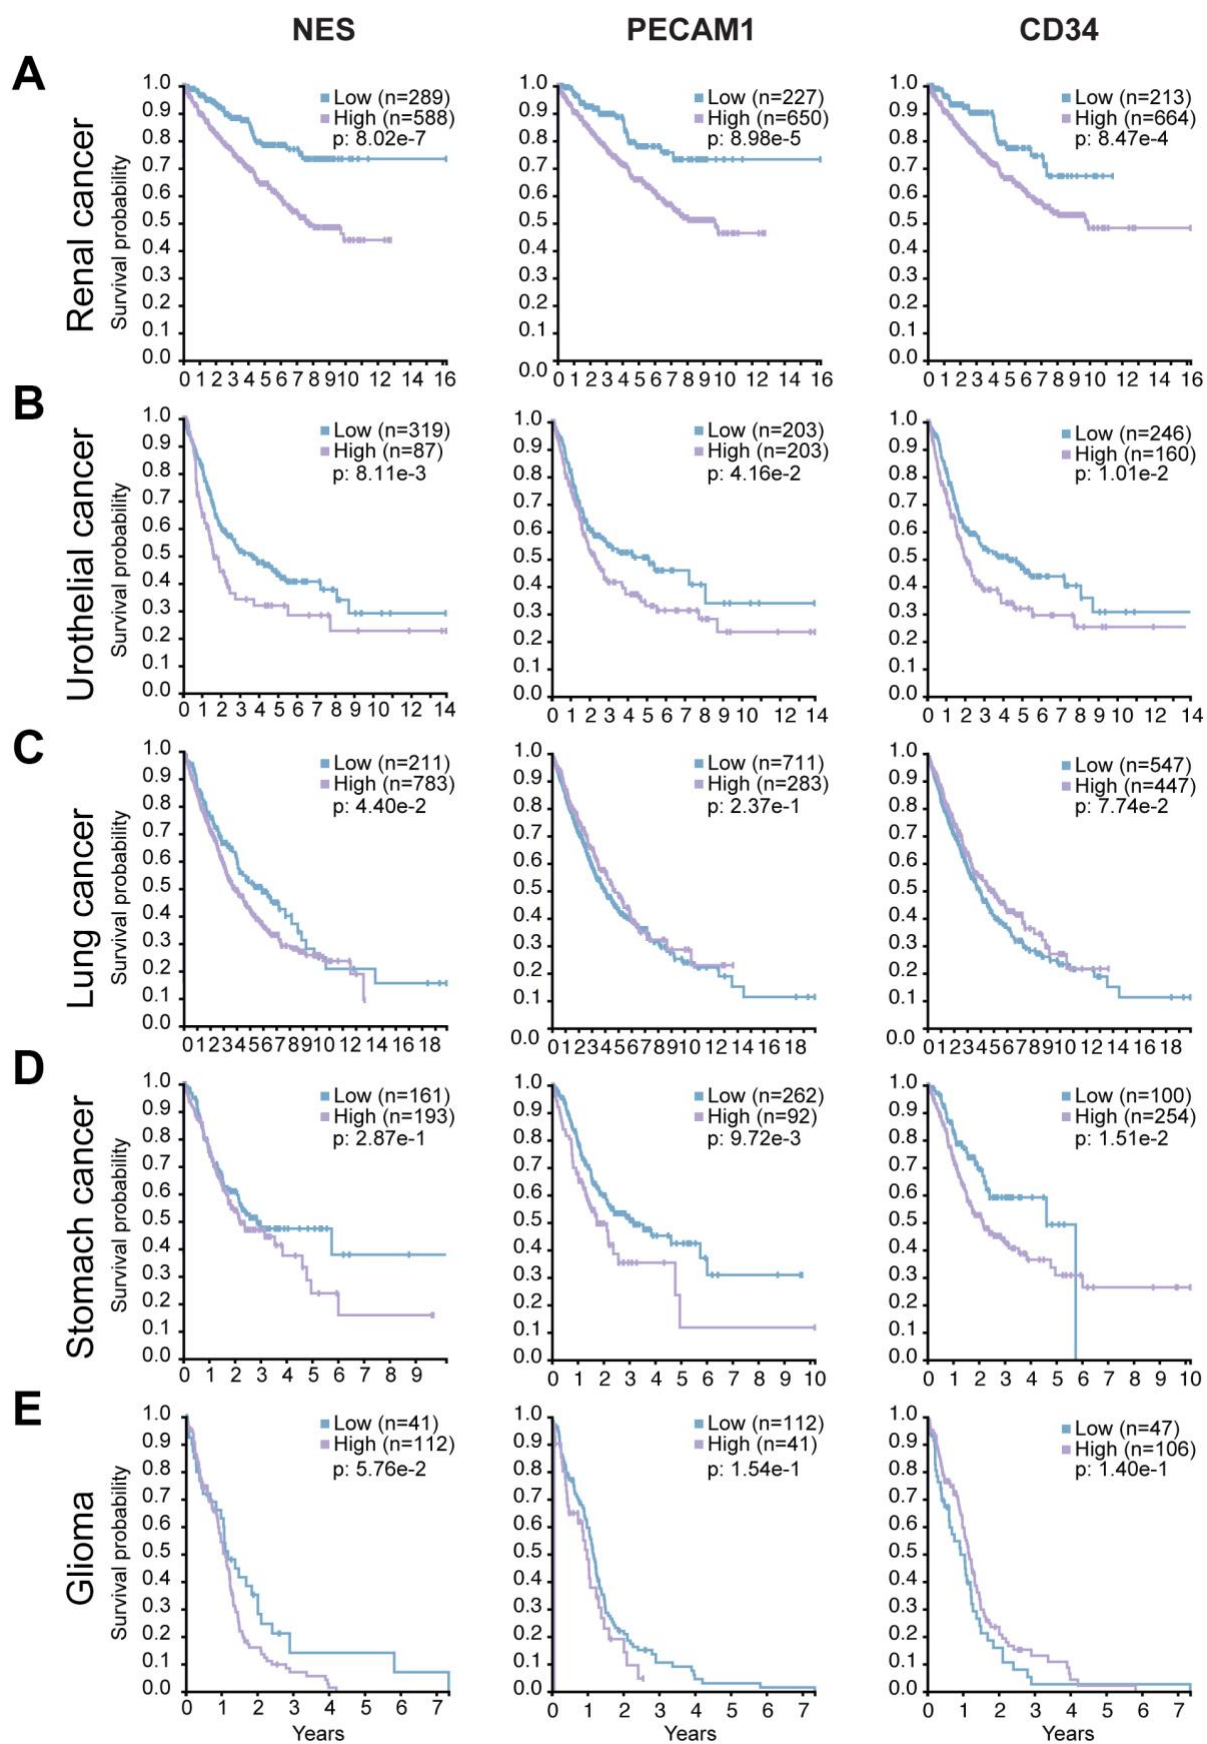

SUPPLEMENTAL FIGURE 3

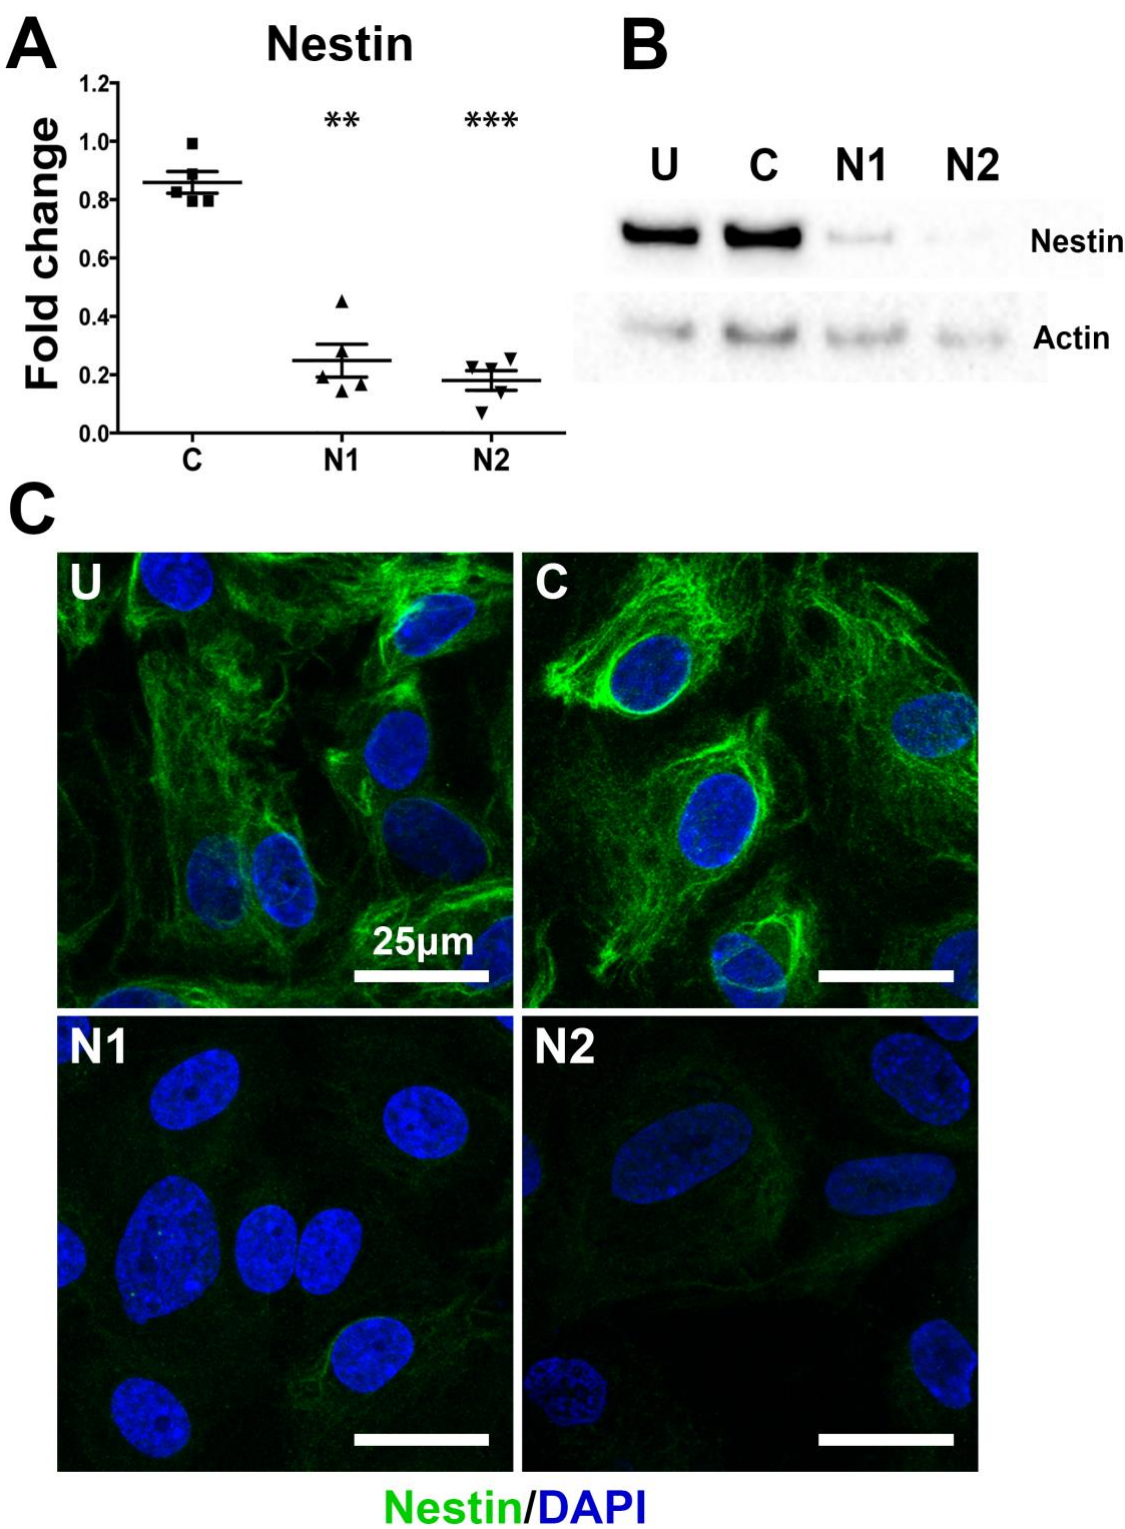

SUPPLEMENTAL FIGURE 4

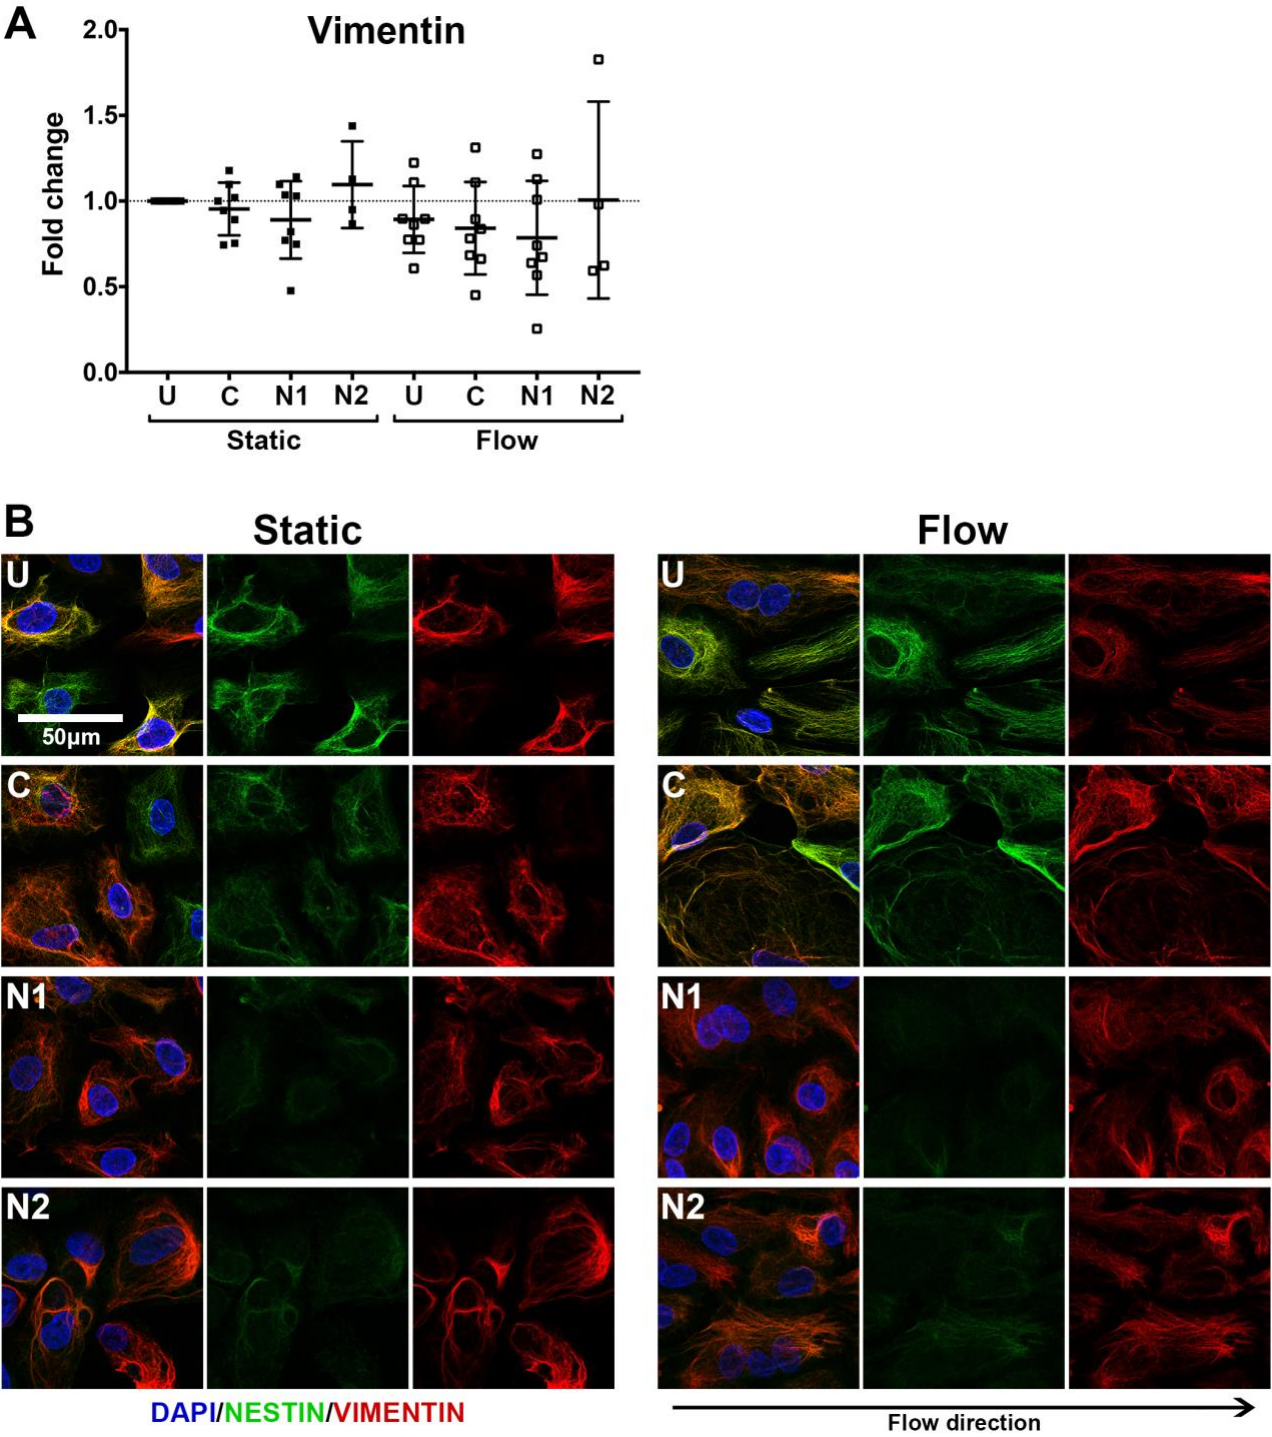

## Supplemental Figure Legends

**Figure S1: EC marker transcripts values correlate with *NES* in GTex dataset: Related to Figure 1.** RNA-seq data from 2841 individual samples from 25 different human tissues from the GTex project were used to generate Spearman pair wise correlation values between *NES* and those encoding for the known EC transcripts *CLEC14A*, *ROBO4*, *TIE1*, *SOX17*, *TEK*, *ESAM*, *NRP1* and *CD34*. Correlation values and corresponding p-values are shown in the top left and bottom right of each scatter plot, respectively.

**Figure S2: Correlation between mRNA expression level and patient survival: Related to Figure 3.** Kaplan-Meier plots summarise results from analysis of correlation between mRNA expression level and patient survival, using best separation, for the genes *NES*, *PECAM1* and *CD34* in (A) renal cancer, (B) urothelial cancer, (C) lung cancer, (D) stomach cancer, and (E) glioma. Patients were divided, based on expression level, into a 'low' or 'high' group. For each Kaplan-Meier plot, corresponding 5-year survival for patients with high expression, 5-year survival for patients with low expression and log-rank P value are displayed. For glioma, 3-year survival is shown. All three genes show significant ( $p < 0.001$ ) association with patient survival in renal cancer with unfavourable prognosis. The survival analysis is described in more detail at the HPA portal ([www.proteinatlas.org/about](http://www.proteinatlas.org/about)).

**Figure S3: Verification of nestin antibody specificity and knockdown efficiency: Related to all Figures.** HUVEC were transfected with control siRNA, or one of two different anti-nestin siRNA sequences. (A) *NES* mRNA expression 72h post-transfection measured by qPCR, and nestin protein expression analysed by (B) Western blot and (C) immunofluorescence staining. (U-Untransfected cells, C-Scrambled control siRNA, N1/N2-anti-*NES* siRNA).

**Figure S4: Vimentin expression and subcellular organisation is not affected by nestin inhibition.** HUVEC were untreated (U) or transfected with control ('C') or one of 2 anti-nestin ('N1' and 'N2') siRNAs and cultured under static conditions, or 10dyne/cm<sup>2</sup> laminar shear stress ('flow') for 24 hours, before measurement of (A) *VIM* mRNA expression and (B) subcellular organisation of nestin and vimentin protein by immunofluorescence staining. Graph shows means  $\pm$ SD.

SUPPLEMENTAL TABLE 1

| Tissue Type           | Human Protein Atlas (HPA) | Genotype-Tissue Expression (GTEx) |
|-----------------------|---------------------------|-----------------------------------|
| Adipose tissue        | 5                         | 176                               |
| Adrenal gland         | 3                         | 57                                |
| Appendix              | 3                         | -                                 |
| Blood                 | -                         | 271                               |
| Blood vessel          | -                         | 280                               |
| Bone marrow           | 4                         | -                                 |
| Brain                 | 3                         | 424                               |
| Breast                | 5                         | 66                                |
| Cervix                | 2                         | -                                 |
| Colon                 | 13                        | 88                                |
| Duodenum              | 2                         | -                                 |
| Endometrium           | 5                         | -                                 |
| Esophagus             | 3                         | 251                               |
| Epididymis            | 1                         | -                                 |
| Gallbladder           | 3                         | -                                 |
| Fallopian tube        | 5                         | 7                                 |
| Heart                 | 5                         | 156                               |
| Kidney                | 9                         | 8                                 |
| Liver                 | 10                        | 35                                |
| Lung                  | 9                         | 153                               |
| Lymph node            | 5                         | -                                 |
| Nerve                 | -                         | 126                               |
| Ovary                 | 3                         | 39                                |
| Pancreas              | 2                         | 71                                |
| Parathyroid           | 1                         | -                                 |
| Pituitary             | -                         | 24                                |
| Placenta              | 8                         | -                                 |
| Prostate              | 11                        | 43                                |
| Rectum                | 4                         | -                                 |
| Salivary gland        | 3                         | -                                 |
| Seminal vesicle       | 3                         | -                                 |
| Skeletal Muscle       | 5                         | 176                               |
| Skin                  | 3                         | -                                 |
| Small intestine       | 4                         | -                                 |
| Smooth muscle         | 3                         | -                                 |
| Spleen                | 5                         | 37                                |
| Stomach               | 4                         | 81                                |
| Testis                | 10                        | 67                                |
| Thyroid               | 5                         | 134                               |
| Tonsil                | 5                         | -                                 |
| Urinary bladder       | 2                         | -                                 |
| Uterus                | -                         | 36                                |
| Vagina                | -                         | 35                                |
| <b>Total included</b> | <b>176</b>                | <b>2841</b>                       |

**Table S1: Source and number of human tissue samples in the HPA and GTEx RNAseq dataset: Related to Figure 1 and 2.** 176 individual samples from 37 different organs (HPA) and 2841 different samples from 25 different organs (GTEx) were analysed for RNA-seq.

## Supplemental Excel Tables:

**Table S2: 150 transcripts most highly correlated with *NES* and corresponding gene ontology grouping analysis: related to Figure 1.** RNA-seq data from 176 individual samples from 37 different human tissues were used to generate Spearman pair wise correlation values between *NES* transcript values and those encoding for all other mapped protein coding genes. Column **A-B**: Gene ID and Spearman pair wise correlation values for the 150 transcripts whose expression most highly correlated with *NES*, across all tissues. Column **D-K**: Gene ontology analysis of these 150 transcripts, using PANTER (<http://geneontology.org/>), GO ontology database release date 2018-02-02) to identify over or under represented biological process. Grey shaded text indicates a false discovery rate (FDR) >0.001. Terms with FDR >0.01 are not displayed.

**Table S3: Tab 1:** Expression quantitative trait (eQTL) analysis of the *NES* gene locus using GWAS and RNA expression data from cultured aortic ECs (HAEC) from 147 individuals. **Tab 2:** Haplotype analysis of the rs3748570, rs11582300, and rs3935541 SNPs on *NES* expression.
